# Supplementary material for: Glyoxal studied with ‘Multimode’, explicit large amplitude motion and anharmonicity
Source: Royal Society of Chemistry journal article supplement (doi:10.1039/b101631h), 2001-01-01
Supplement: tables.pdf [file tables.pdf]

Table S1: Variational calculations with PES  $V_A$  and  $V_B$  and CI basis 3 – 6.6 for the vibrational levels of glyoxal (in  $\text{cm}^{-1}$ )

| CI 3 – 6.6               |          |        | Potential A |           |           | Potential B |           |           |
|--------------------------|----------|--------|-------------|-----------|-----------|-------------|-----------|-----------|
| Assignment               | $C_{2h}$ | $\tau$ | 1-mode      | 2-mode    | 3-mode    | 1-mode      | 2-mode    | 3-mode    |
| Zero Point               | $a_g$    | 0      | 8115        | 8146      | 8144      | 8115        | 8026      | 8026      |
| $\nu_7$<br>torsion       | $a_u$    | 1      | 116         | 117       | 118       | 116         | 115       | 115       |
|                          | $a_g$    | 2      | 247         | 246       | 246       | 247         | 242       | 242       |
|                          | $a_u$    | 3      | 376         | 373       | 373       | 376         | 367       | 367       |
|                          | $a_g$    | 4      | 492         | 495       | 495       | 492         | 501       | 501       |
|                          | $a_u$    | 5      | 618         | 622       | 623       | 618         | 623       | 623       |
|                          | $a_g$    | 6      | 736         | 742       | 743       | 736         | 744       | 743       |
| $\nu_{12}$<br>C-C=O bend | $b_u$    | 0      | 358         | 362       | 361       | 358         | 359       | 359       |
|                          | $b_g$    | 1      | 476         | 488       | 487       | 476         | 496       | 497       |
|                          | $b_u$    | 2      | 610         | 621       | 620       | 610         | 626       | 627       |
|                          | $b_g$    | 3      | 743         | 757       | 756       | 743         | 754       | 755       |
| $\nu_5$<br>C-C=O bend    | $a_g$    | 0      | 544         | 548       | 547       | 544         | 546       | 546       |
|                          | $a_u$    | 1      | 656         | 665       | 664       | 656         | 669       | 670       |
|                          | $a_g$    | 2      | 784         | 786       | 785       | 784         | 784       | 785       |
|                          | $a_u$    | 3      | 906         | 908       | 908       | 906         | 897       | 898       |
| $\nu_6$<br>C-H wag       | $a_u$    | 0      | 860         | 919       | 918       | 860         | 888       | 887       |
|                          | $a_g$    | 1      | 973         | 1012,1069 | 1006,1071 | 973         | 1007,1057 | 1001,1056 |
|                          | $a_u$    | 2      | 1103        | 1126,1228 | 1119,1232 | 1103        | 1115,1136 | 1116      |
|                          | $a_g$    | 3      | 1232        | 1249,1362 | 1240,1368 | 1232        | 1241      | 1241      |
| $\nu_4$<br>C-C stretch   | $a_g$    | 0      | 1057        | 1012,1069 | 1006,1071 | 1057        | 1057      | 1057      |
|                          | $a_u$    | 1      | 1175        | 1126,1228 | 1119,1232 | 1175        | 1191,1223 | 1192,1223 |
|                          | $a_g$    | 2      | 1308        | 1249,1362 | 1240,1368 | 1308        | 1351      | 1350      |
|                          | $a_u$    | 3      | 1440        | 1372,1493 | 1362,1501 | 1440        | 1480      | 1478      |

| CI 3 – 6.6                |          |        | Potential A |           |           | Potential B |        |        |
|---------------------------|----------|--------|-------------|-----------|-----------|-------------|--------|--------|
| Assignment                | $C_{2h}$ | $\tau$ | 1-mode      | 2-mode    | 3-mode    | 1-mode      | 2-mode | 3-mode |
| $\nu_8$<br>C-H wag        | $b_g$    | 0      | 1094        | 1131      | 1132      | 1094        | 1055   | 1055   |
|                           | $b_u$    | 1      | 1208        | 1249      | 1250      | 1208        | 1185   | 1186   |
|                           | $b_g$    | 2      | 1337        | 1373      | 1374      | 1337        | 1310   | 1310   |
|                           | $b_u$    | 3      | 1464        | 1497      | 1498      | 1464        | 1434   | 1435   |
| $\nu_{11}$<br>C-H rock    | $b_u$    | 0      | 1351        | 1374      | 1362,1387 | 1351        | 1319   | 1319   |
|                           | $b_g$    | 1      | 1468        | 1501      | 1489,1515 | 1468        | 1458   | 1458   |
|                           | $b_u$    | 2      | 1600        | 1631      | 1616,1643 | 1600        | 1587   | 1586   |
|                           | $b_g$    | 3      | 1730        | 1760      | 1742,1770 | 1730        | 1714   | 1713   |
| $\nu_3$<br>C-H rock       | $a_g$    | 0      | 1386        | 1406      | 1405      | 1386        | 1355   | 1356   |
|                           | $a_u$    | 1      | 1495        | 1522      | 1524      | 1495        | 1484   | 1487   |
|                           | $a_g$    | 2      | 1635        | 1656,1660 | 1656,1662 | 1635        | 1619   | 1621   |
|                           | $a_u$    | 3      | 1777        | 1798      | 1799      | 1777        | 1756   | 1756   |
| $\nu_{10}$<br>C-O stretch | $b_u$    | 0      | 1803        | 1762      | 1764      | 1803        | 1766   | 1766   |
|                           | $b_g$    | 1      | 1920        | 1881      | 1885      | 1920        | 1898   | 1898   |
|                           | $b_u$    | 2      | 2050        | 2009      | 2013      | 2050        | 2024   | 2024   |
|                           | $b_g$    | 3      | 2180        | 2144      | 2146      | 2180        | 2156   | 2156   |
| $\nu_2$<br>C-O stretch    | $a_g$    | 0      | 1782        | 1760      | 1759      | 1782        | 1762   | 1762   |
|                           | $a_u$    | 1      | 1897        | 1879      | 1880      | 1897        | 1893   | 1893   |
|                           | $a_g$    | 2      | 2029        | 2007      | 2005,2022 | 2029        | 2022   | 2022   |
|                           | $a_u$    | 3      | 2159        | 2146      | 2147,2151 | 2159        | 2151   | 2151   |
| $\nu_9$<br>C-H stretch    | $b_u$    | 0      | 3013        | 3021      | 3022      | 3013        | 2771   | 2771   |
|                           | $b_g$    | 1      | 3129        | 3144      | 3146      | 3129        | 2888   | 2888   |
|                           | $b_u$    | 2      | 3261        | 3273      | 3275      | 3261        | 3017   | 3017   |
|                           | $b_g$    | 3      | 3390        | 3402      | 3404      | 3390        | 3181   | 3181   |
| $\nu_1$<br>C-H stretch    | $a_g$    | 0      | 2884        | 2890      | 2892      | 2884        | 2808   | 2808   |
|                           | $a_u$    | 1      | 2996        | 3011      | 3012      | 2996        | 2928   | 2929   |
|                           | $a_g$    | 2      | 3130        | 3143      | 3145      | 3130        | 3063   | 3063   |
|                           | $a_u$    | 3      | 3262        | 3273      | 3275      | 3262        | 3208   | 3208   |

Table S2: Perturbation calculations for the vibrational levels of glyoxal (in  $\text{cm}^{-1}$ ) with the full potential and the potential depending on the level of mode-coupling, using the basis in Table 1

| SCF-PT                   |          |        | n-mode Potential |        |        | Full Potential |        |        |
|--------------------------|----------|--------|------------------|--------|--------|----------------|--------|--------|
| Assignment               | $C_{2h}$ | $\tau$ | 1-mode           | 2-mode | 3-mode | 1-mode         | 2-mode | 3-mode |
| Zero Point               | $a_g$    | 0      | 8093             | 7969   | 7990   | 7969           | 7989   | 7990   |
| $\nu_7$<br>torsion       | $a_u$    | 1      | 119              | 122    | 121    | 120            | 120    | 121    |
|                          | $a_g$    | 2      | 261              | 264    | 262    | 261            | 260    | 262    |
|                          | $a_u$    | 3      | 409              | 412    | 409    | 407            | 406    | 409    |
|                          | $a_g$    | 4      | 574              | 577    | 577    | 573            | 570    | 577    |
|                          | $a_u$    | 5      | 757              | 770    | 767    | 760            | 761    | 767    |
|                          | $a_g$    | 6      | 973              | 979    | 987    | 978            | 969    | 987    |
| $\nu_{12}$<br>C-C=O bend | $b_u$    | 0      | 360              | 343    | 341    | 339            | 340    | 341    |
|                          | $b_g$    | 1      | 482              | 467    | 463    | 460            | 462    | 463    |
|                          | $b_u$    | 2      | 625              | 612    | 605    | 602            | 603    | 605    |
|                          | $b_g$    | 3      | 777              | 764    | 755    | 750            | 752    | 755    |
| $\nu_5$<br>C-C=O bend    | $a_g$    | 0      | 545              | 552    | 548    | 536            | 547    | 548    |
|                          | $a_u$    | 1      | 660              | 671    | 664    | 651            | 662    | 664    |
|                          | $a_g$    | 2      | 794              | 806    | 798    | 783            | 793    | 798    |
|                          | $a_u$    | 3      | 931              | 946    | 941    | 915            | 928    | 941    |
| $\nu_6$<br>C-H wag       | $a_u$    | 0      | 865              | 818    | 806    | 780            | 809    | 806    |
|                          | $a_g$    | 1      | 980              | 945    | 926    | 900            | 930    | 926    |
|                          | $a_u$    | 2      | 1119             | 1091   | 1067   | 1044           | 1071   | 1067   |
|                          | $a_g$    | 3      | 1264             | 1243   | 1213   | 1192           | 1217   | 1213   |
| $\nu_4$<br>C-C stretch   | $a_g$    | 0      | 1057             | 1041   | 1035   | 1026           | 1034   | 1035   |
|                          | $a_u$    | 1      | 1178             | 1168   | 1160   | 1150           | 1159   | 1160   |
|                          | $a_g$    | 2      | 1321             | 1314   | 1308   | 1294           | 1302   | 1308   |
|                          | $a_u$    | 3      | 1472             | 1466   | 1463   | 1443           | 1450   | 1463   |

| SCF-PT                    |          |        | n-mode Potential |        |        | Full Potential |        |        |
|---------------------------|----------|--------|------------------|--------|--------|----------------|--------|--------|
| Assignment                | $C_{2h}$ | $\tau$ | 1-mode           | 2-mode | 3-mode | 1-mode         | 2-mode | 3-mode |
| $\nu_8$<br>C-H wag        | $b_g$    | 0      | 1095             | 1080   | 1064   | 1053           | 1063   | 1064   |
|                           | $b_u$    | 1      | 1211             | 1202   | 1183   | 1171           | 1182   | 1183   |
|                           | $b_g$    | 2      | 1350             | 1342   | 1321   | 1310           | 1319   | 1321   |
|                           | $b_u$    | 3      | 1494             | 1486   | 1463   | 1451           | 1461   | 1463   |
| $\nu_{11}$<br>C-H rock    | $b_u$    | 0      | 1351             | 1327   | 1312   | 1309           | 1312   | 1312   |
|                           | $b_g$    | 1      | 1471             | 1450   | 1434   | 1430           | 1433   | 1434   |
|                           | $b_u$    | 2      | 1613             | 1590   | 1574   | 1571           | 1572   | 1574   |
|                           | $b_g$    | 3      | 1763             | 1737   | 1719   | 1716           | 1718   | 1719   |
| $\nu_3$<br>C-H rock       | $a_g$    | 0      | 1387             | 1362   | 1353   | 1349           | 1352   | 1353   |
|                           | $a_u$    | 1      | 1498             | 1478   | 1468   | 1461           | 1465   | 1468   |
|                           | $a_g$    | 2      | 1651             | 1627   | 1618   | 1611           | 1613   | 1618   |
|                           | $a_u$    | 3      | 1806             | 1780   | 1772   | 1762           | 1764   | 1772   |
| $\nu_{10}$<br>C-O stretch | $b_u$    | 0      | 1804             | 1753   | 1765   | 1763           | 1765   | 1765   |
|                           | $b_g$    | 1      | 1923             | 1875   | 1886   | 1882           | 1885   | 1886   |
|                           | $b_u$    | 2      | 2063             | 2016   | 2026   | 2023           | 2025   | 2026   |
|                           | $b_g$    | 3      | 2211             | 2164   | 2172   | 2167           | 2170   | 2172   |
| $\nu_2$<br>C-O stretch    | $a_g$    | 0      | 1782             | 1767   | 1761   | 1759           | 1761   | 1761   |
|                           | $a_u$    | 1      | 1901             | 1891   | 1883   | 1879           | 1882   | 1883   |
|                           | $a_g$    | 2      | 2044             | 2033   | 2023   | 2020           | 2020   | 2023   |
|                           | $a_u$    | 3      | 2193             | 2183   | 2171   | 2166           | 2168   | 2171   |
| $\nu_9$<br>C-H stretch    | $b_u$    | 0      | 3016             | 2641   | 2785   | 2778           | 2785   | 2785   |
|                           | $b_g$    | 1      | 3135             | 2761   | 2904   | 2896           | 2904   | 2904   |
|                           | $b_u$    | 2      | 3277             | 2901   | 3047   | 3038           | 3045   | 3047   |
|                           | $b_g$    | 3      | 3425             | 3046   | 3194   | 3184           | 3191   | 3194   |
| $\nu_1$<br>C-H stretch    | $a_g$    | 0      | 2875             | 2798   | 2792   | 2785           | 2792   | 2792   |
|                           | $a_u$    | 1      | 2991             | 2916   | 2910   | 2901           | 2909   | 2910   |
|                           | $a_g$    | 2      | 3135             | 3059   | 3055   | 3045           | 3052   | 3055   |
|                           | $a_u$    | 3      | 3284             | 3206   | 3202   | 3191           | 3199   | 3202   |
